# Supplementary material for: Reducing the burden of dizziness in middle-aged and older people: A multifactorial, tailored, single-blind randomized controlled trial
Source: PLoS Med. 2018 Jul 24;15(7):e1002620. doi: 10.1371/journal.pmed.1002620 (PMC6057644; doi:10.1371/journal.pmed.1002620)
Supplement: S1 Data — (XLSX) [file pmed.1002620.s011.xlsx]

## Sheet: S1_Data
ID	randomisation	Withdrawn_RCT_analysis	Therapies_number	Int_vestibular_rehab_recommended	Int_vestibular_rehab_completed	Int_CBT_recommended	Int_CBT_completed	Int_otago_home_ex_recommended	Int_otago_completed	Int_GPLetter_dizziness_related_factor	Int_FallsClinic_recommended	Int_med_management	Int_FallsClinic_completed	Gender	Age	GPCOG_total_9	Two_or_more_falls_past_year	Hearing_impairment	Visual_impairment	Depression	Anxiety	Head_injury	History_of_unexplained_collapses	Pain_Neck	Total_medications_number	Cardiovascular_meds_yes	Nervous_system_meds_yes	FU_length_days	Total_dizzy_occurences	BA_DHI_Total	RE_DHI_total	BA_CSRT	RE_CSRT	BA_StepTime_var	RE_StepTime_var	BA_PPA_Score	RE_PPA_Score	BA_Coordinated_stability_score	RE_Coordinated_stability_score	BA_GAD7_Total_score	RE_GAD7_Total_score	BA_PHQ9_Total_score	RE_PHQ9_Total_score	BA_NeoFFI_Neuroticism_score	RE_NeoFFI_Neuroticism_score	BA_IconFES_Score	RE_IconFES_Score	BA_OH_3min	RE_OH_3min
D001	0	0	1	1	0	0	0	0	0	0	0	0	0	2	77	8	0	2	0	2	2	2	2	0	2	1	0	167	37	36	20	1039.35	1009.9	0.00916667	0.0101667	0.22	0.37419	3	1	1	1	6	1	17	15	17	13	0	0
D002	0	0	2	0	0	1	0	1	0	0	0	0	0	2	78	8	0	2	1	1	2	2	2	1	7	2	1	165	299	50	34	1220.75	1171.33	0.0308333	0.0223333	1.95219	2.12485	7	1	7	2	14	4	31	21	17	31	0	0
D004	1	0	2	1	1	0	0	0	0	0	1	1	1	1	76	8	0	1	0	2	2	2	2	0	1	0	0	175	189	36	32	1113.85	1179.37	0.0125	0.0216667	0.669848	1.50052	9	6	0	1	2	6	19	11	17	13	0	1
D005	0	0	3	1	0	1	0	0	0	0	1	1	0	1	76	8	0	1	1	1	1	2	2	1	3	1	1	189	9	32		968.1		0.0095		1.19295		12		7		9		37		14		0
D007	0	0	3	1	0	1	0	0	0	0	1	1	0	2	77	9	1	2	1	1	1	2	2	1	4	0	1	283	18	26	32	958.4	958.556	0.0233333	0.0186667	1.18347	1.56506	3	8	8	6	13	6	44	41	10	26	1	0
D008	1	0	1	0	0	0	0	1	1	0	0	0	0	1	72	6	0	2	0	2	2	2	2	0	4	3	0	162	151	70	70	1326.9	1388.32	0.00866667	0.0138333	1.30941	1.70916	25	19	1	8	2	4	25	25	23	30	0	0
D009	1	0	1	0	0	0	0	1	1	0	0	0	0	1	64	6	0	2	0	2	2	2	2	1	0	0	0	187	0	4	0	865.8	928	0.0136667	0.009	-0.0427586	0.774761	2	5	0	0	0	1	29	22	59	15	0	1
D010	0	0	0	0	0	0	0	0	0	0	0	0	0	1	70	9	0	2	0	2	2	2	2	0	2	0	0	191	27	14	10	1225.16	1147.25	0.0116667	0.0131667	0.6002	1.02599	6	13	3	3	0	3	24	26	66	26	0	0
D011	0	0	2	1	0	0	0	1	0	0	0	0	0	2	66	9	0	2	0	2	2	2	2	0	2	2	0	193	4	4	4	1358.6		0.00533333		-0.0837288		13		0	0	0	0	15	13	34		0
D014	0	0	3	0	0	1	0	1	0	0	1	1	0	2	77	9	0	1	0	2	2	2	2	0	6	2	1	278	178	24	24	945.1	1004.32	0.027	0.029	0.0160863	1.8985	28	6	10	8	4	3	24	27	31	31	0	0
D015	0	0	1	1	0	0	0	0	0	0	0	0	0	2	83	6	0	1	1	2	2	2	2	1	3	1	0	211	214	4	44	1381.11	1139.41	0.0216667	0.0233333	-0.611412	1.69407	1	17	0	0	0	0	13	20	18	20	0	0
D016	1	0	3	1	0	0	0	1	1	0	1	1	1	1	91	9	1	1	1	2	2	2	2	1	3	1	0	211	9	38	18	1165.32	1002.39	0.0206667	0.0125	1.45369	1.92711	18	10	0	0	3	0	17	14	29	22	1	1
D017	1	0	2	1	0	1	0	0	0	0	0	0	0	2	74	9	0	2	0	2	2	2	2	1	1	0	0	220	141	22	18	1091.83	1036.53	0.0121667	0.00966667	0.174589	0.362283	7	0	8	3	8	3	20	16	52	17	0	1
D020	1	0	2	0	0	0	0	1	1	1	0	1	0	2	86	7	0	2	1	2	2	2	2	1	7	2	1	304	215	52	42	1624.5	1507	0.0378333	0.04525	1.91716		23	42	6	4	5	3	28	27	25	22	0	0
D022	0	0	2	1	0	0	0	1	0	0	0	0	0	2	82	8	0	2	0	2	2	2	2	1	3	2	0	226	10	14	8	1332.95	1072.25	0.0116667	0.00733333	1.81062	2.12918	6	4	0	4	0	3	19	21	19	24	0	0
D023	1	0	2	0	0	0	0	1	1	1	0	1	0	1	89	7	0	2	1	2	2	2	2	0	4	1	0	221	32	4	20	1185.79	1090.56	0.0245	0.0146667	1.63809		30	28	0	0	1	1	14	14	16	16	0	0
D024	1	1	1	0	0	0	0	0	0	0	1	1	0	1	92	9	1	1	1	2	2	2	2	1	4	1	0			48				0.029		1.6479		7		3		11		14		18
D025	1	1	2	1	0	0	0	1	0	0	0	0	0	2	76	9	0	2	0	2	2	2	2	0	9	6	0			56		1504.8		0.023		1.39149		19		4		8		16		25
D026	1	0	1	0	0	0	0	0	0	0	1	1	1	1	71	8	0	1	0	2	2	2	2	0	4	2	0	232	5	8	12	1073.65	895.412	0.0101667	0.016	0.538141	0.843954	5	31	0	0	2	0	18	15	14	14	1	0
D027	1	0	1	0	0	0	0	0	0	1	0	1	0	1	78	8	0	2	1	2	2	2	2	0	5	2	0	355	40	10	10	1235.05	1298.33	0.009	0.009	0.584608	1.68554	10	15	5	5	4	6	24	19	25	26	1	1
D028	1	0	1	0	0	0	0	0	0	1	0	1	0	1	79	8	0	2	0	2	2	2	2	1	2	1	0	489	36	20	12	1052.5		0.0113333		0.719645		1		3	4	2	1	26	20	19		1
D029	0	0	1	0	0	0	0	0	0	0	1	1	0	1	69	8	0	2	0	2	2	2	2	1	1	0	0	218	0	8	2	1030.1	969.85	0.0103333	0.00683333	-0.0853484	0.593388	0	0	0	0	0	0	2	5	13	12	0	1
D030	1	0	2	0	0	0	0	1	1	0	1	1	1	2	82	7	1	2	1	2	2	2	2	0	5	3	0	222	112	54		1635.9		0.0456667		2.20474		8		6		4		19		23		0
D031	1	0	2	1	0	0	0	0	0	1	0	1	0	1	80	8	0	2	0	2	2	2	2	0	2	0	0	397	0	18	12	925.737	986.588	0.011		1.92809	2.40002	6	15	2	4	1	2	19	22	19	20	0	0
D032	1	0	0	0	0	0	0	0	0	0	0	0	0	2	67	8	0	2	1	2	2	2	2	0	1	0	0	220	0	4	4	1038	1027	0.00833333		-0.575194	-0.324493	1	2	0	0	4	1	1	1	14	13	0	0
D034	0	0	0	0	0	0	0	0	0	0	0	0	0	1	72	9	0	1	0	2	2	2	2	1	3	0	1	225	4	20	10	813.8	930.105	0.014	0.0108333	0.169252	0.175982	0	0	5	3	6	6	22	22	13		0	0
D035	0	0	1	0	0	0	0	0	0	0	1	1	0	2	65	9	1	1	1	2	2	1	2	1	0	0	0	228	6	12	14	1203.2	1117.11	0.015	0.016	0.677491	0.587114	1	2	2	2	3	3	11	18	13	14	0	0
D037	1	0	0	0	0	0	0	0	0	0	0	0	0	2	67	8	0	2	1	2	2	2	2	1	1	0	0	212	72	14	4	1077.56	1160.94	0.0108333	0.0226667	1.3318	1.48242	5	1	1	2	0	1	18	16	16	15	1	0
D038	0	0	2	1	0	0	0	0	0	1	0	1	0	2	71	9	0	2	0	2	2	2	2	0	6	2	0	208	149	22	22	1001.2	991.684	0.0145	0.0265	0.161963	0.719091	0	10	7	4	4	1	36	23	21	15	0	0
D039	0	0	1	1	0	0	0	0	0	0	0	0	0	2	66	8	0	2	0	2	2	2	2	0	0	0	0	248	12	18	18	966	985	0.007	0.00866667	0.42486	1.23709	0	1	0	0	0	1	8	10	17	21	0	0
D040	0	0	1	1	0	0	0	0	0	0	0	0	0	2	60	8	0	2	0	2	2	2	2	1	1	0	0	330	22	12	12	1164.22	1313.26	0.0115	0.0105	0.359502	-1.04064	9	1	0	1	5	3	6	8	19	14	0	0
D042	1	0	3	1	0	0	0	1	0	1	0	1	0	2	71	9	0	1	0	2	2	2	1	1	4	2	0	232	188	40		1161.2		0.0141667		1.03818	1.16908	14	20	3		6		27		23	23	0	1
D043	1	0	0	0	0	0	0	0	0	0	0	0	0	2	70	8	1	2	0	2	2	2	2	1	4	3	0	262	4	20	4	1103.94		0.0075		0.711926		7		0	0	0	1	21	22	21		0
D044	1	0	1	1	1	0	0	0	0	0	0	0	0	2	60	9	0	2	0	2	2	2	2	1	2	0	1	296	52	28	2	1037.05	1006.8	0.00983333	0.0126667	-1.04126	-0.0791494	0	3	1	1	1	2	13	18	11	11	0	0
D045	1	0	0	0	0	0	0	0	0	0	0	0	0	2	67	9	0	2	0	2	1	2	2	1	0	0	0	283	40	6	8	942.95	1090.11	0.0208333	0.0145	0.389403	0.389093	0	0	3	3	1	3	35	31	25	18	0	0
D046	1	0	1	0	0	0	0	1	0	0	0	0	0	2	67	9	0	2	0	2	2	2	2	1	2	0	0	248	12	18	16	926.158	1012.1	0.013	0.00866667	1.55231	1.35149	2	11	2	2	2	3	22	23	22	20	0	0
D047	1	0	0	0	0	0	0	0	0	0	0	0	0	1	64	8	0	2	0	2	2	2	1	1	1	0	1	271	19	20	26	815.4	946.526		0.0141667	0.488882	1.1162	0	1	1	4	2	3	19	17	15	17	0	0
D048	0	0	1	1	0	0	0	0	0	0	0	0	0	1	67	8	0	2	0	2	2	2	2	0	2	2	0	299	16	4	4	786.895	788.222	0.0185	0.0175	1.22049	0.00407459	0	1	0	0	0	1	5	9	12	13	0	0
D049	1	0	1	0	0	1	1	0	0	0	0	0	0	1	63	9	0	1	0	2	2	2	1	0	3	0	0	206	15	38	14	1075.14		0.0118333		0.103836		1		19	3	3	1	27	28	11		0
D051	0	0	0	0	0	0	0	0	0	0	0	0	0	2	66	9	0	2	1	2	2	2	2	1	4	2	1	225	4	34	26	992.105	918.35	0.0121667	0.0173333	0.681267	0.567201	2	3	0	0	0	2	14	12	13	24	0	0
D052	0	0	1	1	0	0	0	0	0	0	0	0	0	2	71	8	0	2	0	2	2	1	2	1	2	0	0	232	27	26	4	1111.85	1189.85	0.0106667	0.0166667	0.486307	0.633963	0	1	1	1	3	0	15	17	23	14	0	0
D053	0	0	1	1	0	0	0	0	0	0	0	0	0	2	62	9	0	1	0	2	2	2	2	0	3	3	0	221	211	30	26	771.053	805.316	0.0095	0.00683333	-0.384042	0.00626939	0	0	3	3	6	5	29	27	19	18	0	0
D056	1	0	0	0	0	0	0	0	0	0	0	0	0	1	69	8	0	1	0	2	2	2	2	0	4	0	0	275	1	18	12	1022.95	1052.28	0.00933333	0.0085	0.211211	1.12485	0	0	0	1	1	2	10	6	20	20	0	0
D057	1	0	1	1	1	0	0	0	0	0	0	0	0	1	62	9	0	1	0	2	2	2	2	1	1	1	0	262	37	12		975.4		0.00766667		-0.533956		0		2		1		16		10		0
D058	1	0	1	0	0	0	0	0	0	1	0	1	0	1	63	9	0	1	0	2	2	1	2	1	7	4	0	291	11	8	12	894.263	799.158	0.00116667	0.0055	0.0551578	-0.0196781	0	0	1	0	5	3	5	2	12	13	0	0
D059	1	0	0	0	0	0	0	0	0	0	0	0	0	1	67	9	0	1	1	2	2	2	2	0	1	0	0	267	67	26	22	941.158	995.65	0.0035	0.012	-1.56921	1.20473	0	0	1	1	1	2	12	11	13	14	0	0
D060	1	1	1	1	0	0	0	0	0	0	0	0	0	1	65	8	0	2	0	2	1	1	1	0	4	0	1			10		1002.8		0.012		0.822497		0		3		1		21		15
D061	0	0	0	0	0	0	0	0	0	0	0	0	0	1	71	9	0	2	0	2	2	2	2	0	2	1	0	262	16	16	14	1059.79	962.111	0.0225	0.0126667	1.38899	1.23138	7	5	0	0	0	0	10	6	14	16	0	0
D062	0	0	0	0	0	0	0	0	0	0	0	0	0	2	75	9	0	2	1	2	2	1	2	1	1	0	0	287	38	32	14	1026.05	1001.81	0.0165	0.0108333	1.14044	0.830087	2	0	7	4	5	8	25	20	18	19	0	0
D063	0	0	0	0	0	0	0	0	0	0	0	0	0	2	72	8	0	2	0	2	2	2	2	0	2	1	0	219	5	18		1134.7		0.0171667		0.343854		1		0		2		22		24		0
D064	0	0	1	0	0	0	0	1	0	0	0	0	0	2	68	9	1	1	1	2	2	2	2	1	4	2	1	321	121	12	16	869.941	973.111	0.0186667	0.0163333	1.14537	1.15805	0	0	1	2	2	3	13	12	19	22	0	0
D065	0	0	0	0	0	0	0	0	0	0	0	0	0	1	69	9	0	2	0	2	2	2	2	0	3	2	0	278	77	6	8	1117.5	940.85	0.00916667	0.00733333	0.583941	0.25323	0	0	0	0	0	0	6	5	18	11	0	0
D067	0	0	0	0	0	0	0	0	0	0	0	0	0	2	67	9	0	1	1	1	1	2	2	1	4	1	1	252	118	40	32	1153.05	1041.1	0.0106667	0.0153333	1.18817	1.8302	5	13	4	4	5	4	18	12	10	16	0	1
D068	0	0	1	0	0	0	0	0	0	1	0	1	0	2	61	9	0	1	0	2	2	2	2	0	0	0	0	274	499	8	54	1037.25	1083.32	0.0111667	0.0075	0.264492	1.33975	0	0	3	4	5	5	16	19	26	23	0	0
D070	1	0	0	0	0	0	0	0	0	0	0	0	0	2	54	9	0	2	0	2	2	2	2	1	0	0	0	351	0	14	12	784.778	745.474	0.00816667	0.00916667	0.571756	1.24691	1	1	4	8	1	2	21	18	12	12	0	0
D073	1	0	2	1	1	1	0	0	0	0	0	0	0	2	57	9	0	1	0	2	2	2	2	0	3	2	1	280	139	72	80	772.05		0.0118333		0.243085		0		7	0	14	0	16	9	24		0
D075	0	0	1	0	0	0	0	0	0	1	0	1	0	1	68	9	0	1	0	2	2	2	2	0	2	1	0	259	16	24	10	1043.2	970.579	0.007	0.00666667	-0.207887	0.7622	1	0	2	1	1	2	14	15	30	11	0	0
D076	1	0	0	0	0	0	0	0	0	0	0	0	0	1	61	8	0	1	0	2	2	2	2	0	3	2	0	272	88	18	16	783.947	742.647	0.009	0.015	0.97246	0.0354528	0	0	0	1	4	5	15	16	13	17	0	0
D077	0	0	2	1	0	0	0	0	0	1	0	1	0	2	51	8	0	2	0	2	2	2	2	0	3	0	1	295	37	6	0	907.2	849.316	0.0111667	0.0125	0.115486	0.738318	11	0	3	0	2	0	21	18	10	13	0	0
D078	1	0	0	0	0	0	0	0	0	0	0	0	0	1	57	8	0	2	0	2	2	2	2	1	3	2	0	264	105	30	38	1245.45	1217.95	0.0133333	0.0105	0.30205	0.96291	5	0	3	4	4	2	14	17	17	19	0	0
D080	0	0	3	1	0	1	0	0	0	1	0	1	0	1	77	8	0	1	1	1	2	1	2	0	3	1	0	265	167	40	50	1048.65	1208.8	0.011	0.0118333	1.17473	1.88585	0	2	9	18	19	22	21	28	22	26	1	1
D081	0	0	1	0	0	1	0	0	0	0	0	0	0	1	54	8	0	2	0	1	1	1	2	1	4	0	1	273	368	44	56	1053.89	1084.25	0.006	0.0131667	0.514713	0.87173	0	0	11	17	23	25	28	32	15	13	0	0
D082	0	0	1	0	0	0	0	0	0	1	0	1	0	1	58	8	0	1	0	2	2	1	2	1	0	0	0	277	242	34	40	893.1	864.2	0.0196667	0.0121667	-0.131071	1.8399	1	1	0	2	2	4	18	16	16	14	0	0
D083	0	0	1	0	0	0	0	0	0	1	0	1	0	1	84	8	0	1	0	2	2	2	2	1	6	2	1	263	274	2	6	1011.37	1046.05	0.0116667		0.872009	0.12957	2	2	1	3	0	2	18	17	13	20	1	0
D084	0	0	0	0	0	0	0	0	0	0	0	0	0	2	77	9	0	2	1	2	2	2	2	1	3	0	1	295	23	20	10	976.667	1111.67	0.0121667	0.013	0.368418	1.20231	2	1	5	4	0	2	21	20	17	17	0	0
D085	1	0	3	1	1	1	0	1	1	0	0	0	0	2	53	9	1	1	0	1	2	1	2	0	4	1	1	287	304	50	50	1006.59	1080	0.0075		0.377556	0.448754	0	0	7	11	19	25	30	37	23	26	0	0
D086	1	0	3	1	1	0	0	1	1	0	1	1	1	2	72	7	0	2	0	2	2	2	2	0	4	3	0	294	45	70	68	1338.21	1077	0.045	0.0125	1.82468	1.10639	12	10	5	5	5	11	16	25	27	30	0	1
D087	0	0	2	1	0	0	0	0	0	1	0	1	0	1	60	9	0	2	0	2	2	2	2	0	0	0	0	286	0	8		909.1		0.0166667		-0.563183		0		3		6		13		39		0
D089	1	0	0	0	0	0	0	0	0	0	0	0	0	2	60	8	0	2	0	2	2	2	2	0	1	0	0	259	108	20	12	950.105	844.722	0.00916667	0.00866667	-0.707312	0.697384	0	0	1	1	3	2	18	14	18	13	0	0
D090	1	0	1	0	0	0	0	0	0	1	0	1	0	2	65	9	0	2	0	2	2	2	2	1	0	0	0	245	136	18	18	1034.35	1071.61	0.0131667		0.349739	1.03623	6	1	2	1	1	0	14	21	13	13	0	0
D091	0	0	3	1	0	0	0	1	0	1	0	1	0	2	55	9	0	2	0	2	2	1	2	1	1	1	0	282	305	50	56	1070.3	1250.16	0.0173333	0.0206667	1.35			18	0	1	3	2	20	17	16	29	0	0
D092	0	0	3	0	0	1	0	1	0	1	0	1	0	2	71	8	1	1	1	1	1	1	2	1	4	1	1	254	22	86		1355.9		0.0233333		2.32424		23		20		26		38		32		1
D093	1	0	1	0	0	0	0	0	0	1	0	1	0	2	51	9	0	2	0	2	2	2	2	0	1	0	0	277	3	16	10	1031.84	950.474	0.0101667	0.0115	0.0493117	0.722885	0	0	0	1	1	1	11	10	14	17	0	0
D094	1	0	1	0	0	0	0	0	0	0	1	1	1	1	77	9	0	1	0	2	2	2	2	0	6	4	0	273	21	20	8	1118.45	1108.6	0.00533333	0.0203333	0.259828	1.01558	10	2	3	2	4	4	21	21	16	16	1	1
D095	1	0	1	0	0	1	0	0	0	0	0	0	0	2	72	9	0	1	0	2	2	1	2	1	0	0	0	258	62	28	36	1074.29	1103.37	0.017	0.0173333	1.0718	1.60921	9	8	4	3	11	10	20	18	23	18	0	1
D096	0	0	2	0	0	1	0	1	0	0	0	0	0	2	74	8	1	2	0	2	2	2	2	1	2	0	1	200	213	60		1400.1				1.78708		32		13		13		30		28		0
D098	0	0	1	1	0	0	0	0	0	0	0	0	0	1	67	8	0	2	0	2	2	1	1	0	2	1	0	228	203	58	68	1059.61	1201.83	0.0171667	0.0121667	0.740052	1.234	0	2	1	3	3	5	13	25	29	20	0	0
D099	0	0	2	1	0	0	0	0	0	1	0	1	0	2	57	9	0	2	0	2	2	2	2	1	1	0	1	203	38	42	30	930.368	1012.21	0.009	0.006	0.79765	0.457702	2	6	2	1	0	1	26	18	22	16	0	1
D100	0	0	3	1	0	0	0	1	0	0	1	1	0	2	89	5	0	1	0	2	2	2	2	0	10	2	1	240	252	46	32	1331.7	1059.58	0.05525	0.031	2.55		10	18	0	0	6	1	17	20	23	17	0	0
D101	0	0	2	1	0	0	0	0	0	1	0	1	0	2	78	9	0	1	1	2	2	2	2	1	14	4	1	252	37	42	50	1267.65	1033.47	0.0085	0.00866667	1.11608	1.24983		5	1	2	3	4	27	27	20	17	1	1
D102	0	0	1	1	0	0	0	0	0	0	0	0	0	1	79	9	0	1	0	2	2	2	2	0	5	2	1	262	27	30	24	1964.8	1290.11	0.0141667	0.022	0.667844	1.48462	25	25	0	1	2	2	10	12	21	23	0	0
D103	1	0	1	0	0	0	0	0	0	1	0	1	0	2	50	9	0	2	1	2	2	2	1	0	0	0	0	248	21	16	10	782.263	867.4	0.016	0.0141667	-0.997453	0.136898	0	0	0	2	0	2	24	24	15	15	1	1
D104	0	0	0	0	0	0	0	0	0	0	0	0	0	1	68	9	0	2	0	2	2	2	2	0	3	2	0	239	26	16	16	812.105	901.6	0.02075	0.00933333	1.13974	1.58778	1	5	5	0	1	1	13	6	13	10	0	0
D105	1	0	1	0	0	0	0	0	0	1	0	1	0	1	73	9	0	2	0	2	2	2	2	0	2	1	0	207	31	46	38	1099.33	1009.22	0.011	0.0111667	0.719366	1.43776	9	22	5	1	2	1	21	17	21	19	0	0
D106	1	0	2	1	1	0	0	1	1	0	0	0	0	2	57	9	0	2	0	2	2	2	2	1	2	0	0	254	99	28	18	978.789	1099	0.0106667		1.18805	0.939416	0	0	4	2	1	0	18	18	24	19	0	0
D108	1	0	1	0	0	0	0	0	0	1	0	1	0	2	57	7	0	1	0	2	2	2	2	1	1	0	1	227	5	40		1032.4		0.018		0.0747069		3		7		8		24		17		0
D109	0	0	1	0	0	0	0	0	0	1	0	1	0	2	60	9	0	2	0	2	2	2	2	0	5	1	1	241	30	10	10	1017.63	1098.1	0.005		0.421457	0.389903	0	0	7	3	7	7	18	12	13	11	1	0
D110	0	0	1	1	0	0	0	0	0	0	0	0	0	1	59	9	0	1	0	2	2	2	2	1	2	1	0	209	25	16	20	959.111	938.526	0.0111667	0.0208333	0.652117	0.506384	0	0	0	0	0	0	14	16	11	11	0	0
D111	0	1	3	1	0	0	0	1	0	0	1	1	0	2	76	7	1	2	0	2	2	2	2	0	11	6	1			44		1298		0.016		2.20621		24		6		1		18		21
D113	0	0	0	0	0	0	0	0	0	0	0	0	0	2	53	6	0	2	0	2	2	2	2	0	3	0	1	203	4	12	8	881.5	928.706	0.0111667	0.017	-0.348778	-1.12976	0	0	2	0	2	0	11	11	13	15	0	0
D115	1	0	3	1	1	0	0	1	1	1	0	1	0	1	76	9	0	2	0	2	2	2	2	0	5	1	0	208	112	24	10	1079.1	1147.05	0.0105		2.17932	2.02906	11	11	2	0	1	2	21	15	14	14	0	0
D116	1	0	2	1	1	1	1	0	0	0	0	0	0	2	66	9	1	2	0	2	2	2	1	1	4	0	1	236	10	10	12	1161.95	1151.42	0.0161667	0.019	1.22909	0.7699	2	4	11	13	3	7	30	32	20	23	0	0
D117	1	0	2	0	0	1	1	0	0	1	0	1	0	2	52	9	0	2	0	2	2	2	2	1	2	2	0	186	9	6	0	959.7	1014.1	0.0085	0.00933333	0.195863	0.500653	0	0	8	2	6	2	20	26	11	10	0	0
D118	0	0	2	1	0	0	0	0	0	1	0	1	0	2	66	9	0	2	0	2	2	2	2	1	2	2	0	162	12	12	10	1083.26	1089.47	0.0215	0.012	0.331445	1.03772	8	3	2	2	2	0	13	10	11	13	0	0
D119	1	0	2	0	0	0	0	1	1	1	0	1	0	2	69	9	0	2	0	2	2	2	2	1	1	0	0	215	199	36	52	1270.53	1209.83	0.0193333		1.79792	0.502889	14	11	5	8	7	7	28	20	21	17	1	1
D120	0	0	0	0	0	0	0	0	0	0	0	0	0	2	52	8	0	2	0	2	2	2	2	0	1	0	0	203	8	14	10	965.684	864.4		0.0123333	1.55025	0.344062	1	1	0	0	2	0	22	11	22	12	0	0
D121	1	0	2	1	1	0	0	0	0	1	0	1	0	1	61	9	0	2	0	2	2	2	2	1	0	0	0	215	65	38	22	959.8	967.294	0.0156667		0.856556	0.854338	0	0	3	3	2	0	24	22	15	16	1	1
D122	1	0	2	1	1	0	0	1	1	0	0	0	0	1	76	6	1	1	0	2	2	1	2	1	1	0	0	203	79	48	40	922.1	950.778	0.0125		2.06269	2.18585	18	24	2	3	3	4	10	12	26	23	0	1
D123	1	0	3	0	0	1	1	1	1	1	0	1	0	2	81	6	0	2	1	1	1	2	2	0	9	4	1	233	212	52	44	1705.74	1417.32	0.057	0.0521667	2.06284	1.29315	36	38	10	4	10	9	29	26	25	20	0	0
D124	1	0	3	1	1	0	0	1	1	1	0	1	0	1	82	9	0	1	0	2	2	1	2	0	0	0	0	196	187	8	16	964	1067.16	0.0208333		1.07131	1.27359	6	3	0	3	0	2	14	3	14	15	0	0
D129	0	0	3	1	0	0	0	1	0	0	1	1	0	1	85	9	0	2	1	2	2	1	2	0	3	0	1	189	243	48	44	1363.76	1200.67	0.0543333		2.84	2.41463	27	34	0	3	5	3	14	16	24	28	1	1
D130	0	0	1	0	0	0	0	0	0	1	0	1	0	2	51	9	1	2	0	2	2	2	2	1	5	0	1	195	31	4	2	896.684	880.474	0.0128333	0.0113333	-0.0458747	0.205599	0	0	3	2	5	10	13	11	18	16	0	0
D132	1	0	0	0	0	0	0	0	0	0	0	0	0	1	54	7	0	2	1	2	2	2	2	0	1	1	0	194	14	8	0	1065.32	944.95	0.005		0.918385	0.344401	0	0	0	0	3	0	23	13	14	10	0	0
D133	1	0	2	0	0	1	0	1	1	0	0	0	0	1	67	9	0	1	1	2	2	2	2	0	2	0	0	293	295	48	36	1333	1592.11	0.015	0.0181667	0.685836	1.50342	4	2	1	2	11	15	31	26		31	0	0
D134	0	0	1	1	0	0	0	0	0	0	0	0	0	2	60	9	0	2	1	2	2	1	2	0	0	0	0	204	40	0	4	937.25	977.526	0.0105	0.00783333	0.161935	0.509994	0	0	2	3	3	3	11	16	14	14	0	0
D135	0	0	2	1	0	0	0	1	0	0	0	0	0	2	52	9	0	2	0	2	2	2	2	1	3	0	0	202	16	6	3	1110.59	1008.76	0.00833333	0.01	0.408922	0.368361	15	4	4	2	3	4	18	19	16	12	0	0
D137	1	0	2	0	0	1	0	0	0	1	0	1	0	1	76	8	0	1	0	2	2	2	2	0	5	1	0	197	0	6	0	909.85	967.222	0.013	0.006	0.32511	0.367029	4	1	7	6	6	1	26	28	14	13	0	0
D138	0	0	2	1	0	0	0	1	0	0	0	0	0	2	71	9	0	2	0	2	2	2	2	0	4	2	0	191	49	42	36	1213.63	1326.25	0.0108333	0.0103333	1.61667	1.97811	7	12	2	4	2	3	11	16	22	20	0	0
D139	1	0	2	0	0	0	0	1	1	0	1	1	0	1	78	9	0	2	0	2	2	2	2	1	9	3	1	194	44	36	40	1476.42	1317.17	0.0425	0.0481667	2.39	2.31101	25	24	2	3	6	12	8	11	24	16	1	1
D140	1	0	2	0	0	0	0	1	1	1	0	1	0	1	76	7	0	2	0	2	2	2	2	1	4	1	0	184	142	72	58	1146.26	1063.93	0.00983333	0.014	2.23725	1.68339	5	3	4	5	7	2	16	12	31	22	0	0
D142	1	0	0	0	0	0	0	0	0	0	0	0	0	1	54	9	0	2	0	2	2	2	2	0	2	0	1	193	9	10	4	991.15	997.95	0.008	0.012	0.116027	-0.729741	2	0	0	0	6	1	24	15	15	13	0	0
D143	1	1	3	0	0	1	0	1	0	1	0	1	0	2	89	9	1	2	1	2	2	2	2	0	4	2	0			30		1472.1				2.15999		29		8		12		26		35
D144	0	0	1	1	0	0	0	0	0	0	0	0	0	2	70	9	0	2	0	2	2	2	2	0	0	0	0	200	0	0	30	992.353	867.95	0.00983333	0.0103333	-0.151085	0.700886	2	0	0	0	3	3	9	10	11	12	0	0
D145	0	0	2	0	0	0	0	1	0	1	0	1	0	2	68	7	0	1	0	2	2	2	2	0	9	6	0	162	211	30	36	1070.16	1013.84	0.0135	0.013	0.804441	1.49389	16	13	0	0	3	3	11	3	19	25	1	1
D146	1	0	1	0	0	0	0	0	0	1	0	1	0	2	66	9	0	2	0	2	2	2	2	1	0	0	0	185	18	10	2	930.579	916.3	0.00916667	0.0115	0.446338	0.722779	8	5	0	3	6	8	22	20	17	13	1	1
D147	0	0	2	1	0	0	0	0	0	1	0	1	0	1	69	9	0	2	0	2	2	2	2	0	4	1	0	166	14	26	20	1054.59	1098.5	0.0136667	0.0105	0.159386	0.731719	0	0	5	4	5	3	28	24	16	14	0	0
D148	1	0	0	0	0	0	0	0	0	0	0	0	0	2	61	8	0	2	0	2	2	2	2	0	2	0	0	175	13	10	6	1000.89	1045	0.0113333	0.0185	0.379863	0.177776	0	1	0	0	0	2	10	11	18	18	0	0
D149	1	0	0	0	0	0	0	0	0	0	0	0	0	1	64	9	0	2	0	2	2	2	2	1	3	1	0	175	12	4	8	942.526	1007.21	0.00616667	0.00883333	-0.096515	0.475975	0	4	4	9	3	4	10	12	15	12	0	0
D150	0	0	1	1	0	0	0	0	0	0	0	0	0	2	79	9	0	2	0	2	2	2	2	1	3	2	0	175	41	18	18	1090.65	1051.19	0.00816667	0.00833333	0.529599	1.02753	2	3	3	2	2	0	17	17	23	16	0	0
D151	1	0	1	0	0	0	0	1	1	0	0	0	0	2	70	9	0	2	0	2	2	2	2	0	1	1	0	217	157	28	44	1211.22	998.316	0.0155	0.0128333	1.85976	1.51605	1	1	0	0	0	1	13	10	21	17	0	0
D152	0	0	2	1	0	0	0	0	0	1	0	1	0	2	63	9	0	2	0	2	2	2	2	1	1	0	1	186	34	24	20	968	1014.33	0.0111667	0.0135	0.107149	0.997054	0	2	0	1	0	1	11	10	15	14	1	0
D153	0	0	0	0	0	0	0	0	0	0	0	0	0	2	68	9	0	2	0	2	2	2	2	0	4	0	1	155	12	4		1051.4		0.0148333		0.846908		13		4		1		20		20		0
D154	0	0	0	0	0	0	0	0	0	0	0	0	0	2	62	8	0	2	1	2	2	2	2	0	4	1	1	166	13	10	8	893	971.6	0.00533333	0.009	1.03794	2.05864	7	0	0	0	5	5	13	12	10	10	0	0
D155	0	0	0	0	0	0	0	0	0	0	0	0	0	1	62	9	0	2	1	2	2	2	2	1	1	0	1	208	46	24	16	1060.53		0.0141667		0.47782		0		3	4	4	2	20	16	16		0
D156	0	0	2	1	0	0	0	1	0	0	0	0	0	2	66	9	0	2	0	2	2	2	1	1	1	1	0	208	31	54	50	1186.94		0.0235		2.24991		22		2	0	6	3	20	16	28		0
D157	1	0	3	0	0	1	0	1	1	1	0	1	0	1	62	8	1	2	0	1	1	2	2	0	4	2	1	180	40	74	56	1014.7	1010.6	0.018	0.0253333	1.92647		32	29	8	13	7	10	33	30	29	37	0	1
D158	1	0	2	0	0	1	1	0	0	1	0	1	0	2	61	7	0	2	0	2	2	2	2	0	0	0	0	185	54	34	10	921.7	857.263	0.0101667	0.00833333	1.35911	1.00287	0	0	7	0	6	0	22	20	13	11	0	0
D159	0	0	1	0	0	0	0	0	0	1	0	1	0	1	69	9	0	1	0	2	2	2	2	0	4	2	0	185	3	0	0	957.556	1143.7	0.0106667	0.0116667	0.550991	1.6833	2	3	0	0	0	0	15	15	13	13	1	1
D161	0	0	1	1	0	0	0	0	0	0	0	0	0	2	66	9	0	2	0	2	2	2	2	0	2	1	0	175	24	26	16	917.4	775.35	0.018	0.0156667	-0.510236	-0.164166	10	7	1	3	5	5	20	19	20	16	0	1
D162	1	0	2	0	0	0	0	1	1	1	0	1	0	2	63	9	0	1	0	2	2	2	2	0	0	0	0	187	33	34	26	912.167	879.3	0.0148333	0.014	1.98875	0.423075	0	0	3	3	9	3	16	13	22	20	1	0
D163	1	0	2	0	0	1	0	1	1	0	0	0	0	2	80	9	0	1	0	2	2	2	2	1	4	0	1	203	164	36	46	1286.42		0.0285	0.0308333	1.15593	1.53753	29	32	9	5	10	10	38	40	27	35	0	1
D164	1	0	2	0	0	0	0	1	1	1	0	1	0	1	80	7	0	1	0	2	2	2	2	1	0	0	0	202	126	12	16	1072.8	1102.59	0.0108333	0.0125	2.34719	1.82509	8	3	0	0	2	2	8	8	17	14	0	0
D165	1	0	1	0	0	1	1	0	0	0	0	0	0	1	67	9	1	1	0	1	2	1	1	1	10	5	1	175	18	30	14	1003.7	1013.75	0.00483333	0.00733333	1.46356	1.02147	2	0	8	3	11	5	14	14	15	13	0	0
D166	0	0	2	0	0	0	0	1	0	1	0	1	0	2	67	9	1	2	0	1	1	2	1	1	4	1	1	156	110	34	38	979.118	1098	0.0156667	0.0298333	1.0599	1.71507	12	7	6	6	6	5	33	28	28	27	1	0
D167	0	0	2	1	0	0	0	1	0	0	0	0	0	2	73	8	1	1	0	2	2	2	2	0	1	0	0	142	140	52	46	1253.94	1389.05	0.0165	0.0255	2.54		1	3	0	0	2	2	6	15	32	28	1	1
D168	0	0	0	0	0	0	0	0	0	0	0	0	0	2	79	8	0	1	1	2	2	2	2	0	3	2	1	188	5	14	20	992.556	1028.95	0.00966667	0.0191667	1.56932	0.831972	7	1	0	0	0	1	8	15	15	20	0	0
D169	0	0	1	0	0	0	0	0	0	1	0	1	0	2	65	7	0	2	1	1	2	2	2	0	1	0	1	195	44	22	16	1153.69				0.640293		0		3	0	6	5	17	16	17		1
D170	1	0	2	0	0	1	0	0	0	1	0	1	0	2	58	9	0	2	1	2	2	2	2	1	4	1	1	190	184	66	26		1126.2	0.0186667	0.016	-0.176135	0.237037	4	0	9	5	13	7	27	23	15	13	0	0
D171	0	0	2	0	0	0	0	1	0	1	0	1	0	1	69	7	0	2	0	2	2	2	2	0	1	0	0	171	61	26	18	1155.11	1160.85	0.0238333	0.0231667	2.39099	2.27572	17	4	2	2	4	3	25	23	15	16	1	1
D172	1	0	0	0	0	0	0	0	0	0	0	0	0	1	66	8	0	2	0	2	2	2	1	0	1	0	0	174	2	17	14	1035.47	910.1	0.0055	0.011	-0.179596	1.18555	0	0	0	0	0	0	13	14	21	15	0	0
D173	0	0	2	0	0	0	0	1	0	1	0	1	0	1	86	9	0	1	0	2	2	2	1	1	10	5	1	167	123	8	12	1148.05	1158.3	0.0136667	0.0243333	1.84243	2.94914	4	4	0	2	1	3	13	14	20	22	0	1
D174	1	0	1	1	1	0	0	0	0	0	0	0	0	1	73	9	0	1	0	2	2	2	2	0	4	2	1	184	67	16	18	1146.72	1193.81		0.0245	0.678487	1.0673	12		4	3	2	3	15	18	27	20	0	0
D175	1	0	1	0	0	0	0	0	0	1	0	1	0	2	62	9	0	2	0	2	2	2	2	0	0	0	0	176	114	40	30	974.875	1035.94	0.01075	0.00583333	0.765845	1.62435	0	0	4	0	3	2	17	12	16	19	0	0
D176	0	0	2	1	0	0	0	0	0	1	0	1	0	1	72	9	0	1	0	2	2	2	2	0	7	1	1	192	15	14	4	910.5	1119.47	0.00966667	0.00883333	-0.661862	0.437886	1	0	2	0	0	1	11	12	12	12	1	1
D177	1	0	1	0	0	0	0	0	0	1	0	1	0	2	64	9	0	2	0	2	2	2	2	0	3	2	1	176	32	54	16	958.2	891.789	0.0075	0.008	0.0221308	-0.0366975	2	3	1	0	4	3	26	17	18	14	1	0
D178	1	0	0	0	0	0	0	0	0	0	0	0	0	1	72	9	0	1	0	2	2	1	2	0	3	2	0	155	6	14	12	998.45	982.75	0.0105	0.011	1.02402	1.07287	0	0	1	0	3	3	9	10	17	13	0	0
D179	1	0	1	0	0	0	0	0	0	1	0	1	0	2	64	9	0	1	0	2	2	2	2	1	3	0	0	182	3	14	6	1040.5	1030.89	0.011	0.011	-1.43009	0.176251	15	0	1	0	1	1	18	15	14	11	1	1
D180	0	0	0	0	0	0	0	0	0	0	0	0	0	1	69	9	0	2	0	2	2	1	1	0	3	0	0	163	0	8	6	1188.2	1100.15	0.015	0.021	1.15861	0.911336	0	0	2	0	1	0	16	15	22	20	0	0
D181	1	0	0	0	0	0	0	0	0	0	0	0	0	2	72	9	0	2	1	2	2	2	2	0	3	1	0	167	74	8	4	951.467	1039.39	0.0148333	0.00816667	0.0763241	1.86361	11	3	1	0	1	1	11	6	18	17	0	0
D182	0	0	1	1	0	0	0	0	0	0	0	0	0	1	65	8	0	2	0	2	2	2	2	0	1	1	0	176	7	24	16	933.063	1064.5	0.0156667	0.0141667	0.578257	0.938395	2	0	0	0	0	0	9	16	15	15	0	0
D183	1	0	0	0	0	0	0	0	0	0	0	0	0	2	67	9	1	1	1	2	2	2	2	1	2	0	0	180	13	20	16	1090.63	1045.53	0.0101667	0.0113333	0.825765	1.5336	1	5	2	3	1	2	10	5	20	20	0	0
D184	0	0	0	0	0	0	0	0	0	0	0	0	0	2	62	9	0	1	0	2	2	1	1	1	1	0	0	164	44	22	14	942.526	1064.2	0.0116667	0.0136667	1.34423	1.17297	0	2	1	3	4	4	15	9	19	17	0	0
D185	0	0	1	0	0	0	0	0	0	1	0	1	0	1	70	8	0	1	0	2	2	2	2	0	4	2	0	169	31	38	22	1249.28	1339	0.0118333	0.013	0.525888	1.62625	7	0	1	5	0	2	16	17	24	16	1	0
D186	0	0	0	0	0	0	0	0	0	0	0	0	0	1	66	9	0	1	0	2	2	2	2	0	4	1	1	175	0	16	8	791.444	853.737	0.0123333	0.0176667	1.22351	2.11697	2	0	1	0	1	1	10	10	14	13	0	0
D187	1	0	1	0	0	0	0	0	0	1	0	1	0	2	68	9	0	1	1	1	2	2	2	0	2	0	1	169	10	14	16	972.316	913.526	0.0106667	0.00583333	-0.219178	0.161112	6	0	2	6	2	1	7	11	19	18	0	0
D188	1	0	1	0	0	0	0	0	0	1	0	1	0	2	70	9	0	2	0	2	2	2	2	1	0	0	0	166	16	10	6	983	959.111	0.0198333	0.0141667	0.0908881	0.882974	0	0	0	0	1	2	13	5	14	10	1	0
D189	0	0	2	1	0	1	0	0	0	0	0	0	0	1	67	9	0	1	0	2	2	2	2	1	5	4	0	173	191	14	26	997.8	1119.19	0.007	0.0065	0.431246	1.25975	1	1	11	13	10	14	30	31	13	13	0	0
D190	0	0	2	0	0	0	0	1	0	1	0	1	0	2	62	9	0	2	0	2	2	2	2	1	2	1	0	176	21	38	36	1119.7	1104.9	0.01	0.00783333	1.36803	1.76267	1	0	0	0	4	0	21	21	21	14	1	1
D191	0	0	1	0	0	0	0	0	0	1	0	1	0	2	64	9	0	2	0	2	2	2	2	1	2	0	0	183	89	24	28	1055	1007.74	0.01	0.00483333	0.966009	1.02213	10	1	0	0	0	1	12	14	16	17	0	0
D193	1	0	2	0	0	1	0	1	0	0	0	0	0	2	68	9	0	1	1	1	1	2	2	1	8	3	1	205	200	82	80	1245.75				1.85425		0		12	17	15	19	39	33	32		0
D195	0	0	2	0	0	0	0	1	0	1	0	1	0	1	69	9	0	1	1	2	2	1	2	0	1	0	0	174	92	10	12	924.6	873.6		0.0128333	2.00571	1.56352	0	0	0	0	1	3	12	16	10	10	0	0
D196	1	0	1	0	0	0	0	0	0	1	0	1	0	2	62	8	1	2	0	2	2	2	2	1	7	1	1	188	77	44	38	1138.2	1164.63	0.023	0.0178333	0.797546	1.86252	9	16	6	5	5	4	36	30	27	26	1	0
D197	0	0	2	1	0	1	0	0	0	0	0	0	0	2	60	9	0	2	0	1	2	2	2	1	0	0	0	188	123	24	26	1145.94	911.8	0.0075	0.0105	-0.240509	1.11739	15	3	4	8	13	13	23	25	14	16	0	0
D198	0	0	1	0	0	0	0	0	0	1	0	1	0	2	67	9	1	2	0	2	2	1	1	0	0	0	0	188	4	8	8	1169.65	1159.95	0.012	0.012	0.887197	1.65855	1	0	6	6	8	9	29	20	17	17	1	1
D199	1	0	1	0	0	1	0	0	0	0	0	0	0	2	61	8	0	1	0	1	2	2	2	1	4	1	1	191	0	26		928.7		0.00366667		-0.158233		0		13		8		34		20		0
D200	0	0	1	0	0	1	0	0	0	0	0	0	0	1	69	8	0	1	0	2	2	1	2	1	2	1	0	191	7	12		920.3		0.01		0.223899		1		7		6		12		11		0
D201	1	0	4	1	1	1	1	1	1	1	0	1	0	2	64	9	0	1	0	1	2	1	2	1	10	2	1	197	70	24	26	1105.41	1143.05	0.0165	0.0113333	1.26489	1.93825	24	21	15	9	20	19	34	22	27	22	0	1
D202	1	0	2	0	0	0	0	1	1	1	0	1	0	1	71	9	0	1	0	2	2	2	2	1	7	3	0	318	216	38	12	939.474	929.833		0.0256667	1.86485	2.15667	3	1	2	0	6	3	20	17	11	10	0	0
D203	1	0	1	1	1	0	0	0	0	0	0	0	0	2	67	9	0	2	0	2	2	2	2	0	2	1	0	166	23	4	6	1072.75	877.053	0.00983333	0.00616667	-0.17514	-0.0489471	0	2	0	0	0	0	4	4	13	13	0	1
D204	0	0	2	1	0	0	0	1	0	0	0	0	0	2	76	9	1	1	0	2	2	2	2	0	2	0	0	177	80	8	28	1205.16	1454.56	0.0156667	0.0675	1.97872	1.2857	11	3	3	1	2	2	3	10	20	20	0	0
D205	1	0	1	0	0	0	0	0	0	1	0	1	0	2	60	9	0	2	1	2	2	1	2	0	1	0	0	158	5	2	6	939.526	975.118	0.00583333	0.00733333	1.37982	0.427389	0	0	0	0	0	3	8	9	16	14	1	0
D206	0	0	1	0	0	1	0	0	0	0	0	0	0	2	61	9	0	2	1	2	1	2	2	1	5	3	0	214	11	44	44	1171.06	994.5	0.0233333	0.0145	1.14111	1.49974	2	0	5	5	2	5	28	27	19	20	0	0
D207	0	0	2	1	0	1	0	0	0	0	0	0	0	2	72	9	1	1	0	1	2	2	2	1	3	1	1	185	34	56	44	883.857	825.7		0.00866667	1.0723	2.29693	16	11	2	6	13	15	39	29	22	23	0	1
D208	1	0	2	1	1	0	0	0	0	1	0	1	0	1	69	9	0	1	0	1	1	2	2	1	2	0	0	169	154	32	32	997.95	878.167	0.00833333		-0.235877	-0.0374594	1	0	5	12	8	11	13	8	17	14	1	1
D209	1	0	1	1	1	0	0	0	0	0	0	0	0	2	62	7	0	2	0	2	2	2	2	1	2	1	0	208	103	22	26	915.579	941.167		0.0128333	0.0171346	-0.356661	0	0	4	2	2	2	19	4	18	18	0	1
D210	1	0	0	0	0	0	0	0	0	0	0	0	0	1	71	9	0	1	0	2	2	2	2	0	4	2	0	161	2	12	6	1005.37	873.75	0.0085	0.0095	1.53387	1.77954	4	1	1	1	1	3	18	22	11	13	0	1
D211	0	0	0	0	0	0	0	0	0	0	0	0	0	2	71	9	0	1	0	2	2	2	2	1	2	2	0	175	5	4	8	777.824	875.588	0.0126667	0.0095	-0.0812762	0.761209	1	1	5	1	2	6	16	24	17	17	0	0
D212	0	0	2	1	0	0	0	0	0	1	0	1	0	1	62	9	0	1	0	2	1	2	1	1	4	2	0	188	59	54	52	966.1	1068.42	0.00483333	0.0146667	0.128119	1.13217	0	0	7	7	13	13	32	32	24	24	0	0
D213	1	0	2	1	1	0	0	0	0	1	0	1	0	2	70	9	0	1	0	2	2	2	2	1	0	0	0	207	8	14	0	946.111	821.353	0.0075	0.0256667	0.792618	0.482819	0	0	2	2	4	0	33	17	20	17	0	0
D216	1	0	1	0	0	1	0	0	0	0	0	0	0	1	60	9	0	1	0	2	2	2	2	0	2	1	1	167	50	10	12	780.611	728.35	0.00716667	0.00533333	-0.557509	-0.354641	0	0	18	13	5	8	18	30	12	16	0	0
D217	0	1	0	0	0	0	0	0	0	0	0	0	0	2	73	9	0	2	0	2	2	2	2	1	9	1	0			16		1193.9		0.016		0.902734		2		3		7		22		15
D218	0	0	2	0	0	1	0	1	0	0	0	0	0	2	69	9	1	1	0	2	2	2	2	1	15	2	1	201	16	26	22	1258.32	1367.53	0.0123333	0.0105	2.38513	2.16771	2	3	1	3	12	9	14	10	23	17	0	0
D219	1	0	1	1	1	0	0	0	0	0	0	0	0	1	61	9	0	1	0	2	2	1	2	1	2	0	1	199	14	28	28	982.79	994.111	0.00716667	0.0125	-0.298065	0.59939	0	0	0	1	3	4	19	13	18	17	0	0
D221	0	0	2	1	0	1	0	0	0	0	0	0	0	2	71	9	0	2	0	2	2	2	2	1	2	0	1	199	213	10	14	897.053	949	0.00866667	0.01	-0.0559597	1.19366	7	7	9	2	11	9	26	19	24	19	0	0
D222	1	0	1	1	1	0	0	0	0	0	0	0	0	2	66	8	0	2	0	2	2	2	1	0	5	3	0	194	146	4	12		1039.95		0.00616667	-0.0111241	0.209126	10	4	0	0	0	3	17	13	15	13	0	0
D223	0	0	2	1	0	0	0	1	0	0	0	0	0	2	66	9	0	2	1	2	2	2	2	0	1	0	0	194	17	12	10	963.579	914.842	0.0101667	0.0171667	1.71628	1.13671	2	0	0	1	1	1	18	16	20	20	0	0
D224	1	0	2	0	0	0	0	1	0	1	0	1	0	2	73	9	0	1	1	2	2	2	1	0	3	1	1	170	6	6		1046.3		0.0095		1.25342		6		0		4		26		10		0
D225	0	0	1	1	0	0	0	0	0	0	0	0	0	2	66	8	0	2	0	2	2	2	2	0	3	2	0	193	117	38	26	1097.83	1147.89	0.011	0.00883333	0.528036	1.53897	1	1	0	4	2	1	15	15	16	14	0	1
D226	1	0	1	1	0	0	0	0	0	0	0	0	0	2	72	8	0	2	1	2	2	2	2	1	6	4	0	218	0	54	0	1193.37	1003.42	0.0131667	0.0178333	-0.103219	0.587387	1	0	0	0	0	0	7	0	15	18	0	0
D227	1	0	0	0	0	0	0	0	0	0	0	0	0	1	66	9	0	2	1	2	2	2	2	0	0	0	0	211	20	4	12	1002.45	1038.5	0.00966667	0.00783333	1.19178	0.284923	1	0	0	2	1	2	20	17	12	13	0	0
D228	0	0	0	0	0	0	0	0	0	0	0	0	0	2	53	7	0	2	0	2	2	2	2	0	2	0	1	211	8	32	12	914.833	816.158	0.00616667	0.014	0.0271688	0.637578	0	0	4	5	1	1	19	16	30	36	0	0
D230	1	0	1	1	0	0	0	0	0	0	0	0	0	2	74	8	0	2	0	2	2	1	2	1	7	3	1	238	11	12	24	1037.65	1068.45	0.0113333	0.00883333	0.782018	1.27566	6	13	0	10	0	4	13	16	18	21	0	0
D231	0	0	3	0	0	1	0	1	0	1	0	1	0	2	71	7	1	1	0	1	2	1	2	0	9	2	1	211	69	30	34		1024.59	0.021	0.0115	2.1671	1.88092	22	14	5	6	12	8	29	21	16	15	1	1
D232	0	0	1	1	0	0	0	0	0	0	0	0	0	2	64	9	0	2	0	2	2	2	2	0	1	0	1	201	6	22	24	1028.21	1039.85	0.0108333	0.0231667	1.07278	1.61719	0	0	0	1	0	2	20	17	22	20	0	0
D236	1	1	1	0	0	1	0	0	0	0	0	0	0	2	62	8	0	2	0	2	2	2	2	1	2	0	1			78						0.850632		6		3		4		24		37
D237	1	0	2	1	1	0	0	0	0	1	0	1	0	2	78	6	0	2	1	2	2	2	2	1	4	0	1	185	42	10	8	1317.83	1298.61	0.0141667	0.0266667	1.22477	1.78413	1	10	3	2	3	3	13	17	26	25	1	1
D241	0	0	2	1	0	0	0	0	0	1	0	1	0	1	66	8	0	2	0	2	2	2	2	0	5	1	1	201	220	32	46	922.45	918.2		0.00483333	0.13276	-0.260612	0	0	3	2	4	5	12	18	18	18	0	1
D242	1	0	1	1	1	0	0	0	0	0	0	0	0	2	59	9	0	2	0	2	2	2	2	0	2	0	1	211	6	14	4	955.45	933.947	0.0095	0.00833333	0.577945	0.787172	0	0	0	0	0	1	13	12	11	11	0	0
D243	0	0	0	0	0	0	0	0	0	0	0	0	0	1	57	9	0	2	0	1	1	2	2	1	1	0	1	190	62	28	32	1099.15	987.85		0.009	-0.25607	-0.0638829	5	3	3	2	8	9	17	17	14	13	0	0
D244	0	0	1	1	0	0	0	0	0	0	0	0	0	2	53	9	0	2	0	2	2	2	2	0	5	0	1	187	55	52	42	958.15	996.25		0.01	1.2402	-0.0707049	0	0	4	4	5	2	34	23	21	19	0	1
D246	1	0	0	0	0	0	0	0	0	0	0	0	0	2	71	9	1	2	0	2	2	2	2	1	3	2	0	215	221	36	42	980.053	980.882		0.0205	0.894347	1.08301	11	9	0	0	1	1	16	19	22	23	0	0
D248	0	0	2	1	0	0	0	0	0	1	0	1	0	1	64	7	0	2	0	2	2	1	1	0	0	0	0	211	0	6		893.3				0.484373		2		0		0		14		10		0
D249	1	0	1	0	0	0	0	0	0	0	1	1	1	1	87	8	0	2	1	2	2	2	2	1	5	2	0	251	273	32	50	1957.8	1993.15	0.0385		2.12501	2.35635	7	9	4	4	4	9	19	19	26	23	1	1
D251	1	1	0	0	0	0	0	0	0	0	0	0	0	2	69	8	0	2	0	2	2	2	2	1	2	1	0			16		1079.3		0.009		0.0582479		10		3		4		24		20
D253	1	0	2	1	1	0	0	1	1	0	0	0	0	2	91	9	1	2	1	2	2	2	2	1	6	3	1	196	111	36	26	2003.44		0.0338333		3.28		29		0	0	0	0	16	12	32	40	0	1
D254	0	0	3	1	0	1	0	0	0	1	0	1	0	1	76	8	1	2	1	1	2	1	1	0	7	2	0	201	73	24	28	878.4	908.95	0.0126667	0.00866667	1.75132	1.0933	2	6	7	4	8	3	26	19	17	18	0	0
D257	1	0	1	1	1	0	0	0	0	0	0	0	0	2	77	9	0	2	0	1	2	2	2	1	2	0	1	255	176	22		1048.7		0.024		0.851596		0		3		1		11		16		1
D258	0	0	2	1	0	0	0	1	0	0	0	0	0	2	74	8	0	2	0	2	2	2	2	1	0	0	0	194	162	12	8	1062.2	1119.05	0.0123333	0.0143333	2.0506	1.11416	4	4	5	12	2	5	32	27	13	15	0	0
D259	0	0	0	0	0	0	0	0	0	0	0	0	0	1	68	8	0	1	1	1	1	2	2	1	8	2	1	175	28	22	0	990	783.842	0.0193333	0.0183333	0.605311	1.08241	10	4	5	7	11	7	26	25	15	11	0	0
D260	1	0	1	0	0	0	0	0	0	1	0	1	0	1	66	9	0	2	0	2	2	2	2	1	10	3	0	248	76	16	8	1113.8	1141.05	0.0125	0.0173333	0.613053	0.816775	0	0	4	4	4	4	23	18	13	12	1	0
D261	1	0	2	0	0	1	0	0	0	1	0	1	0	2	72	7	1	2	0	1	2	2	2	1	4	0	1	187	14	12	8	1163.35	1118.72	0.013	0.0103333	1.1661	1.14705	6	3	8	7	20	15	34	31	29	23	1	0
D263	0	0	2	0	0	1	0	0	0	1	0	1	0	2	61	9	0	2	1	2	2	2	2	1	5	0	1	197	333	56		1034.9		0.0235		1.74742		3		12		6		3		19		1
D264	1	0	0	0	1	0	0	0	0	0	0	0	0	1	67	8	0	2	0	2	2	2	2	0	0	0	0	204	14	16	2	1137.55	1105.8	0.0125		1.05492	0.618762	0	0	0	0	0	0	11	12	12	10	0	0
D265	1	0	2	1	0	0	0	0	0	1	0	1	0	1	69	8	0	1	0	2	2	2	2	0	0	0	0	211	0	8	6	1132.2	1099.85	0.00633333	0.009	0.0204229	-0.170746	0	1	0	0	0	0	10	9	12	12	0	0
D266	0	0	2	0	0	0	0	1	0	1	0	1	0	1	89	9	0	1	0	2	2	2	1	0	4	1	0	197	6	12	10	1187.85	1136.1	0.0258333	0.0138333	1.60662	1.98836	23	18	0	0	0	1	15	18	17	17	0	0
D267	0	0	1	1	0	0	0	0	0	0	0	0	0	2	54	9	0	2	0	2	2	2	2	1	3	2	1	183	110	22	40	876.25	864.65	0.00783333		1.25355	0.749066	0	0	5	5	3	4	20	24	16	18	0	0
D268	1	0	2	1	1	0	0	1	1	0	0	0	0	2	72	9	1	1	0	2	1	2	2	1	1	0	0	202	232	60	38	1085.37	908.895	0.0253333	0.025	2.76035	1.89032	5	8	5	6	3	1	33	29	26	27	0	0
D269	0	0	1	1	0	0	0	0	0	0	0	0	0	1	74	9	0	2	0	2	2	2	2	0	10	4	1	193	160	14	10	1005	790.437	0.0115	0.0106667	-0.205739	-0.0251101	0	0	0	0	0	1	20	18	10	10	0	0
D271	0	1	3	1	0	1	0	0	0	1	0	1	0	2	70	8	0	2	0	1	1	2	2	0	2	0	1			26		930.1		0.0125		0.888996		6		8		11		43		29
D273	1	0	2	1	1	0	0	0	0	1	0	1	0	2	64	9	0	2	0	2	2	2	2	0	0	0	0	213	13	26	24	1177.33	1100.26	0.00633333	0.016	0.329607	0.305638	1	0	7	6	6	1	19	22	16	15	1	0
D274	1	0	2	1	1	0	0	0	0	1	0	1	0	2	55	9	1	2	0	2	2	1	1	0	5	2	1	175	192	18	26	1028.3	1027.9	0.015	0.0108333	1.19688	1.59746	14	20	2	2	2	2	20	16	20	26	0	0
D275	0	0	0	0	0	0	0	0	0	0	0	0	0	2	62	9	0	2	0	2	2	2	2	1	0	0	0	176	13	6	12	800	1066.9	0.0115	0.00716667	-0.544684	0.245396	0	0	5	6	5	4	18	19	13	16	0	0
D276	0	0	1	1	0	0	0	0	0	0	0	0	0	2	71	9	0	2	0	2	2	2	2	0	2	0	0	213	96	14	14	1265.06		0.0173333		1.30594		2		1	1	3	2	15	18	14		1
D277	1	0	1	1	1	0	0	0	0	0	0	0	0	2	70	9	0	1	0	2	2	2	2	0	5	1	0	181	5	6	8	1001.89	1015	0.0166667	0.038	-0.180308	1.36487	13	1	0	0	2	6	7	13	16	16	0	0
D278	0	0	0	0	0	0	0	0	0	0	0	0	0	2	74	9	0	2	1	1	2	2	2	0	2	1	0	186	187	50	56	1138.58	937.368	0.0146667	0.01175	1.64676	1.74381	0	0	4	5	8	8	26	28	30	26	0	0
D279	0	0	2	0	0	0	0	1	0	1	0	1	0	1	88	9	0	2	0	2	2	2	2	0	3	0	0	192	6	0	0	1381.95	1286.18	0.0216667	0.0311667	2.28	2.03263	31	35	0	0	1	1	4	4	13	15	1	1
D280	0	0	2	0	0	1	0	1	0	0	0	0	0	2	70	6	0	2	0	1	1	2	2	1	3	1	1	197	195	62	72	1550.74	1354.61	0.0215		1.50783	2.03408	31	31	10	17	16	18	27	26	30	35	0	0
D281	1	0	1	0	0	0	0	1	1	0	0	0	0	1	75	9	0	2	0	2	2	2	2	0	10	0	1	188	21	10	6	1059.05	1071.18	0.024	0.0281667	1.97778	1.63523	14	13	2	4	1	1	22	20	21	26	0	0
D282	0	0	4	1	0	1	0	1	0	1	0	1	0	2	71	9	1	2	0	2	1	2	2	0	8	1	1	188	202	54	46	1309	1274.8	0.0103333	0.0158333	1.92396	1.13508	4	7	4	1	9	3	23	18	28	23	1	1
D283	0	0	3	1	0	0	0	1	0	1	0	1	0	2	65	8	1	1	0	2	2	2	2	1	0	0	0	192	69	28	28	926.3	909.235	0.009	0.009	1.80359	0.95586	1	5	0	8	4	5	20	22	18	15	0	0
D284	0	0	1	1	0	0	0	0	0	0	0	0	0	1	60	8	1	1	0	2	1	2	2	1	1	1	0	188	13	50	50	900.25	1021.79	0.0113333	0.014	-0.837225	0.409676	1	0	0	0	2	1	14	13	14	17	0	1
D285	0	0	0	0	0	0	0	0	0	0	0	0	0	2	65	9	0	2	0	2	2	2	2	0	1	1	0	178	151	24	6	1035.33	884.3	0.0236667	0.00966667	1.38331	0.845911	5	1	3	0	0	0	20	19	22	17	0	0
D286	0	0	2	1	0	0	0	0	0	1	0	1	0	2	68	9	0	2	1	2	2	2	2	1	4	1	0	190	14	18	6	1148.11	1051.58	0.0128333		-0.0795802	0.564519	10	2	0	0	1	1	4	1	14	11	0	1
D287	0	0	0	0	0	0	0	0	0	0	0	0	0	1	70	8	0	2	0	2	2	2	2	0	7	4	0	196	15	24	12	972.6	944.778	0.0143333	0.014	0.44869	0.327633	0	0	0	1	1	2	1	3	21	14	0	1
D288	1	0	0	0	0	0	0	0	0	0	0	0	0	2	52	8	0	2	0	2	2	2	1	0	0	0	0	191	23	10	6	828.526	800.579	0.00716667		0.652273	-0.416421	0	0	3	3	4	1	19	16	13	16	0	1
D289	1	0	2	1	1	0	0	0	0	1	0	1	0	1	62	9	0	1	0	2	2	2	2	0	4	3	0	199	246	32	0	1033.95	945	0.00533333		-0.326463	0.392005	0	0	0	0	3	0	9	1	26	10	1	0
D290	1	1	1	0	0	0	0	0	0	1	0	1	0	2	73	9	0	2	0	2	2	2	2	0	2	1	1			40		1017.4				0.782316		0		3		0		20		19
D291	0	0	2	1	0	0	0	1	0	0	0	0	0	2	64	9	1	2	0	2	2	1	2	1	17	5	1	206	133	44	38	973.842	1191.84	0.04425	0.0526667	1.83217	1.5243	1	0	2	0	1	3	10	1	27	22	0	0
D292	1	0	2	1	1	1	0	0	0	0	0	0	0	2	59	8	0	2	0	2	2	2	1	1	2	0	1	185	88	60	54	1141.53	1042.5	0.0126667	0.00866667	1.6152	0.340877	1	1	9	4	8	2	19	25	16	17	0	0
D293	1	0	1	1	0	0	0	0	0	0	0	0	0	1	78	9	0	2	0	2	2	1	2	0	0	0	0	209	28	8	8	1067		0.00975		0.902782		9		4	2	1	2	8	20	13		0
D294	0	0	1	0	0	0	0	0	0	1	0	1	0	2	73	9	0	2	1	2	2	2	2	1	10	2	1	190	13	16	26	1262.05		0.0178333		1.00945		11		2	5	4	5	20	21	19		0
D295	1	0	2	1	1	0	0	0	0	1	0	1	0	2	71	8	0	2	1	2	2	1	2	1	6	4	0	195	107	44	48	1275.95	1049.33	0.0203333	0.0121667	1.51146	1.26078	23	12	3	3	7	4	33	31	23	27	1	1
D297	0	0	0	0	0	0	0	0	0	0	0	0	0	2	60	9	0	2	0	2	2	2	2	0	0	0	0	202	8	14	14	1099.3	817.421	0.015		1.15807	0.767114		1	0	0	1	1	16	13	18	16	0	0
D298	1	0	1	0	0	0	0	0	0	1	0	1	0	1	78	9	0	2	0	2	1	2	2	0	9	1	1	197	46	68	66	1119.65	966.947	0.018	0.0111667	1.36587	0.692281	4	0	6	7	9	9	32	30	26	27	0	0
D300	1	0	1	0	0	1	0	0	0	0	0	0	0	2	57	8	0	1	0	2	2	2	2	1	2	0	1	202	103	56	12	824.4	782.684	0.009	0.00883333	0.333843	-0.205331	0	0	15	0	13	6	34	31	40	40	0	0
D301	0	0	0	0	0	0	0	0	0	0	0	0	0	2	72	9	0	2	0	2	2	2	2	0	4	2	1	190	0	38	0	1038.06	1299.25	0.0205	0.0136667	1.03118	1.30059	1	11	2	0	2	2	18	19	18	20	0	0
D302	0	0	1	1	0	0	0	0	0	0	0	0	0	1	68	9	0	1	1	2	2	2	2	0	2	0	0	186	165	10	8	978.895	1030.53	0.0095		-0.0941103	0.301567	1	0	0	0	0	0	2	2	14	13	0	0
D303	1	0	0	0	0	0	0	0	0	0	0	0	0	1	64	9	0	2	0	2	2	2	2	0	1	1	0	203	4	8	10	902.7	837.1	0.0263333	0.0103333	0.506651	0.400677	0	1	1	1	0	0	15	19	36	15	0	0
D304	1	0	2	1	0	0	0	0	0	1	0	1	0	2	69	8	0	2	0	2	2	2	2	1	0	0	0	206	39	14	8	825.368	939.474	0.019	0.0106667	0.409598	-0.270675	0	3	0	0	1	0	16	13	11	10	1	1
D305	1	0	1	1	1	0	0	0	0	0	0	0	0	2	71	9	0	1	0	2	2	2	1	0	0	0	0	193	12	2	0	969.85	977.688	0.0145	0.00916667	1.25525	0.814095	1	1	2	3	0	1	14	12	15	12	0	1
D308	0	0	1	1	0	0	0	0	0	0	0	0	0	2	62	9	0	2	0	2	2	2	2	1	1	0	1	211	8	34	42	1021.74	1003.25	0.0126667	0.018	0.351193	1.09896	7	14	2	1	2	1	18	15	17	20	0	0
D309	0	0	0	0	0	0	0	0	0	0	0	0	0	1	56	9	0	2	0	2	2	2	2	1	5	0	1	184	2	28		988.1		0.0085		0.7025		0		2		1		20		12		1
D310	1	0	1	0	0	1	0	0	0	0	0	0	0	2	60	9	0	2	0	2	2	2	1	0	1	0	0	190	13	20	6	1038.06	976.056	0.015	0.0136667	-0.106228	0.656539	2	2	8	1	5	2	19	18	20	19	0	0
D313	0	0	1	0	0	0	0	0	0	1	0	1	0	2	58	8	0	1	0	2	2	2	2	1	4	1	1	197	40	20	28	1086.65	1018.76	0.00766667	0.0095	0.976347	0.968232	3	0	5	2	4	2	13	14	16	18	1	1
D314	0	0	1	0	0	0	0	1	0	0	0	0	0	2	72	9	0	2	0	2	2	2	2	0	3	2	0	238	5	24	42	1582.1	1159.95	0.0228333	0.017	1.3563	1.65266	17	8	0	0	4	4	19	18	27	29	0	1
D315	0	0	1	0	0	1	0	0	0	0	0	0	0	2	61	8	0	1	1	1	2	2	2	0	2	0	0	231	61	16	12	970.118	998.056	0.0118333	0.0241667	1.40224	2.1886	11	5	7	9	13	9	23	22	21	28	0
D316	1	0	0	0	0	0	0	0	0	0	0	0	0	1	63	9	0	2	1	2	2	2	2	0	1	1	0	204	2	6	6	1003.44	922.368	0.0278333	0.00883333	1.01201	1.53204	1	0	0	3	0	3	16	12	29	16	0	0
D317	1	0	2	1	1	0	0	0	0	1	0	1	0	1	63	9	0	2	0	2	2	2	2	1	2	0	0	204	54	50	42	1208.89	1073.58	0.013	0.0135	0.809061	0.255255	0	2	0	0	5	5	13	18	26	18	0	0
D318	1	0	2	0	0	0	0	1	1	1	0	1	0	2	62	9	0	2	0	1	1	1	2	1	5	1	1	182	76	56		1664.1		0.0245		3.13911		31		5		8		29		32		1
D319	1	0	0	0	0	0	0	0	0	0	0	0	0	1	69	9	0	2	0	2	2	2	2	1	2	1	0	193	3	4	2	1011.95	986.55	0.00966667	0.0126667	-0.244288	1.07035	0	0	0	0	2	1	15	17	10	12	0	0
D320	0	0	1	0	0	0	0	0	0	1	0	1	0	1	67	8	0	2	0	2	2	2	1	1	9	4	0	174	5	24		1243.4		0.0178333		0.339728		8		0		1		18		20		1
D321	1	0	1	1	1	0	0	0	0	0	0	0	0	1	63	9	0	2	0	2	2	2	2	0	2	1	0	198	0	26	8	988.8	905.1	0.0258333	0.015	0.516513		1	0	1	0	2	0	14	11	18	14	0	0
D323	1	0	2	1	1	1	1	0	0	0	0	0	0	2	66	9	0	2	1	2	2	1	2	1	6	1	1	192	36	38	26	1140.53	1093.42	0.0145	0.012	0.584382	0.701619	12	2	13	3	10	4	29	18	16	14	0	0
D324	0	0	0	0	0	0	0	0	0	0	0	0	0	2	65	9	0	1	1	2	2	2	2	1	1	0	0	191	72	14	10	881.368	958.947	0.0158333	0.0201667	-0.23121	0.222777	0	0	0	1	2	2	7	11	11	12	1	0
D325	1	0	0	0	0	0	0	0	0	0	0	0	0	2	72	9	0	2	1	2	2	2	2	0	1	1	0	191	4	22	20	968.842	987.7	0.0153333	0.0123333	0.940771	0.891639	8	2	6	1	7	3	22	22	15	19	0	0
D328	1	0	2	0	0	1	0	1	1	0	0	0	0	1	82	9	0	1	1	2	1	2	2	0	3	2	0	207	207	64	60	1540.37	1456.56	0.025	0.0296667	3.45		42	43	7	6	9	5	24	28	27	32	0	1
D329	1	0	3	1	1	0	0	1	1	0	1	1	0	2	73	9	0	2	1	2	2	1	2	1	6	3	1	203	25	22	24	1187.26	1079.41	0.0118333	0.014	1.6589	1.56577	5	13	6	2	5	8	18	15	23	19	1	1
D330	0	0	0	0	0	0	0	0	0	0	0	0	0	1	67	9	0	2	0	2	2	2	2	0	0	0	0	172	163	2	2	994.842	950.95	0.00783333	0.0126667	0.484413	0.775195	0	0	0	1	2	0	5	8	16	13	0	1
D331	1	0	1	1	1	0	0	0	0	0	0	0	0	2	64	9	0	2	0	2	2	1	2	0	1	1	0	191	24	28	14	1098.44	980.105	0.0191667	0.0106667	0.524587	0.823499	0	5	6	3	4	3	18	20	28	30	0	0
D332	0	0	1	0	0	0	0	1	0	0	0	0	0	1	71	9	0	2	0	1	2	2	2	0	0	0	0	169	210	48	44	1021.7		0.011		0.218036		47		2	0	3	5	16	12	28		0
D333	1	0	0	0	0	0	0	0	0	0	0	0	0	1	67	9	0	2	0	2	2	2	2	1	3	0	1	182	13	22	18	922.15	961.2	0.0135	0.00716667	-0.15643	-0.173585	2	1	3	3	4	2	10	5	17	15	1	1
D334	1	0	0	0	0	0	0	0	0	0	0	0	0	2	60	9	0	2	0	2	2	2	2	0	0	0	0	196	3	4	4	993.789	901.684	0.0163333	0.0113333	-0.456773	0.429044	3	2	0	1	0	0	15	9	13	13	0	0
D335	0	0	0	0	0	0	0	0	0	0	0	0	0	1	51	9	0	2	1	2	2	2	2	0	0	0	0	165	48	12	12	891.632	855.053	0.0101667	0.0151667	-0.945449	-0.094004	3	0	6	4	5	4	26	23	12	12	0	0
D336	0	0	2	1	0	0	0	0	0	1	0	1	0	2	70	9	0	2	0	2	2	2	2	0	4	2	1	201	1	0	4	995.4	958.789	0.012	0.00616667	0.467198	0.261832	5	7	0	0	2	2	14	17	14	14	0	0
D337	1	0	0	0	0	0	0	0	0	0	0	0	0	2	74	8	0	1	0	2	2	2	1	0	4	0	0	200	0	2	0	1278.71	1116.74	0.014	0.0108333	1.20126	0.943231	0	1	1	0	0	0	16	16	17	14	0	0
D338	0	0	0	0	0	0	0	0	0	0	0	0	0	2	60	9	0	1	0	2	2	2	2	0	1	0	0	206	6	0	0	901.1	927.65	0.00366667	0.008	0.349377	-0.176745	0	0	1	1	0	0	5	5	12	11	0	0
D339	1	0	2	1	1	0	0	1	0	0	0	0	0	1	82	8	0	2	0	2	2	2	1	0	7	3	0	207	210	44		1194.1		0.0296667		1.21328		10		1		2		21		19		0
D340	1	0	1	1	1	0	0	0	0	0	0	0	0	2	64	9	0	2	0	2	2	2	2	0	2	2	0	223	15	16	10	1240.35	985.6	0.0138333	0.0155	0.1077	0.460937	6	0	3	0	3	3	18	17	13	11	0	0
D341	0	0	2	1	0	0	0	1	0	0	0	0	0	2	62	9	0	1	0	1	1	1	2	1	6	0	1	189	47	74	58	1094.74	1166.7		0.0201667	1.48		35	31	3	1	2	3	22	23	32	31	0	0
D342	0	0	2	1	0	0	0	1	0	0	0	0	0	2	72	9	0	2	1	2	2	2	2	0	1	0	0	197	154	16	18	1210.06	1109.74	0.0183333	0.0166667	1.70335	1.86524	24	37	1	3	2	2	2	1	17	19	0	0
D343	0	0	3	0	0	1	0	1	0	1	0	1	0	2	61	9	0	2	0	1	2	2	2	1	13	1	1	205	160	26	18	921.421	961.111	0.0201667	0.0143333	2.44449		6	1	5	1	20	15	23	24	15	13	1	0
D344	1	0	1	0	0	1	0	0	0	0	0	0	0	2	65	9	1	1	1	1	1	2	2	1	5	1	1	186	66	50	30	1021.95	1045.42	0.01225	0.00866667	1.16726	1.60631	4	1	4	1	6	4	25	24	24	17	1	0
D345	0	0	0	0	0	0	0	0	0	0	0	0	0	2	71	9	1	2	0	2	2	2	2	0	0	0	0	220	19	8	4	898.789	856.053	0.0151667	0.00616667	0.447267	0.388438	1	1	0	0	1	3	14	16	17	13	0	0
D346	1	0	1	1	0	0	0	0	0	0	0	0	0	2	66	9	0	2	0	2	2	2	2	1	2	0	1	189	5	30	12	891.895	849.2	0.009	0.0105	0.0613493	0.656387	1	0	3	1	2	1	13	18	19	23	1	0
D347	1	0	2	0	0	1	1	0	0	1	0	1	0	2	64	9	0	1	1	2	2	2	2	1	1	1	0	185	38	18	20	1149.15	1154.72	0.0166667	0.0116667	1.41491	1.10753	2	0	7	5	7	6	22	21	19	18	1	0
D348	0	0	1	0	0	0	0	0	0	1	0	1	0	2	65	9	1	1	1	2	2	2	2	0	2	0	1	208	125	8	0	931.941	904.75	0.00275	0.0118333	1.2446	0.614793	0	0	2	0	2	1	15	13	14	12	0	0
D349	1	0	2	1	1	1	1	0	0	0	0	0	0	2	66	9	0	1	0	2	2	2	1	1	2	0	1	199	55	78	24	1077.56	921.667	0.0266667	0.0135	1.79	1.34523	10	3	17	1	13	0	26	22	29	22	0	0
D350	1	0	1	0	0	1	0	0	0	0	0	0	0	2	66	8	0	2	1	2	1	2	2	1	1	0	0	187	26	20	24	965.105	953.5	0.0175	0.0193333	-0.546634	0.266603	1	0	7	0	2	2	25	22	14	12	0	0
D351	1	0	1	1	1	0	0	0	0	0	0	0	0	1	64	9	0	2	1	2	2	1	1	0	0	0	0	208	39	34	24	757.55	788.25	0.00833333	0.0146667	1.13532	0.973429	0	0	1	1	2	0	11	12	23	19	0	0
D352	0	0	1	1	0	0	0	0	0	0	0	0	0	2	61	8	0	1	0	2	2	2	2	1	0	0	0	187	40	24	20	1019.75	967.056	0.0123333	0.013	-0.725833	-0.265033	1	0	3	4	3	4	13	11	16	17	0	0
D353	0	0	1	1	0	0	0	0	0	0	0	0	0	2	65	9	0	1	0	2	2	2	2	0	2	0	0	210	16	28	22	1146.28		0.0123333	0.0113333	1.27702	1.38186	1	0	0	0	3	0	16	16	12	14	0	0
D355	0	0	1	0	0	0	0	1	0	0	0	0	0	2	76	9	0	2	1	2	2	2	2	1	4	3	0	185	8	12	28	1406.58	1389.8	0.0253333	0.0216667	1.33688	4.14739	13	9	4	4	6	9	29	28	32	25	0	0
D356	1	1	2	1	0	0	0	0	0	1	0	1	0	2	58	9	0	2	0	2	2	2	2	1	2	0	0			50		1012.5		0.012		0.441336		1		3		3		21		16
D357	0	0	1	0	0	0	0	0	0	1	0	1	0	1	54	9	0	2	0	2	2	2	2	0	2	1	0	210	10	16	24	950.6	782.4	0.0106667	0.0065	0.0146234	-0.606482	0	2	4	0	0	3	9	11	11	11	0	0
D358	1	0	2	1	1	0	0	0	0	1	0	1	0	2	60	9	0	2	0	2	2	2	2	1	4	0	1	209	8	22	20	1237.15	1180.63	0.0135	0.0136667	0.940533	1.17418	0	1	3	1	2	6	23	24	16	15	1	0
D359	0	0	0	0	0	0	0	0	0	0	0	0	0	1	66	9	0	2	1	2	2	2	2	1	4	2	0	203	5	0	0	812.3	819.579	0.009	0.0135	1.73194	1.04411	2	1	0	0	0	0	18	18	13	11	0	0
D360	0	0	1	0	0	0	0	1	0	0	0	0	0	2	66	9	0	2	0	2	2	2	1	0	2	0	1	195	1	14	12	902.944	961.944	0.0121667	0.0115	1.02759	1.47459	0	1	0	0	3	3	17	17	16	13	1	1
D362	1	0	1	1	1	0	0	0	0	0	0	0	0	1	65	9	0	2	0	2	2	2	2	0	1	1	0	189	98	12	14	915.3	778.684	0.00866667	0.00983333	-0.381443	0.0137036	0	0	2	3	6	10	20	30	13	12	0	0
D363	0	0	1	1	0	0	0	0	0	0	0	0	0	2	63	9	0	2	0	2	2	2	1	1	1	1	0	196	50	22	20	1019.94	1158.9	0.0101667	0.00883333	0.776104	1.30789	2	1	0	0	1	0	0	2	19	14	0	0
D364	1	0	1	1	1	0	0	0	0	0	0	0	0	1	65	9	0	1	0	2	2	2	2	1	2	1	1	195	0	40	16	876.263	733.211	0.0128333	0.0336667	1.19111	0.772147	7	8	1	4	1	1	18	14	14	12	0	0
D365	1	0	0	0	0	0	0	0	0	0	0	0	0	2	51	9	0	1	0	2	2	1	2	0	2	0	1	201	38	4	8	1104.9	1012.55	0.0263333	0.0105	0.515984	0.541196	0	1	2	0	1	1	12	11	14	14	0	0
D366	0	0	3	1	0	0	0	1	0	1	0	1	0	1	84	9	1	1	0	2	2	2	2	0	5	2	0	204	92	8	16	1343.4		0.0156667	0.0151667	2.23499	3.20425	25	37	2	3	1	1	15	12	25	27	1	1
D367	1	0	2	0	0	0	0	1	1	1	0	1	0	1	82	8	0	1	1	2	2	2	2	1	4	3	0	196	41	28	30	1093.56	900.1	0.0165	0.0193333	1.54855	0.960412	11	23	2	1	3	2	25	16	19	17	1	1
D368	1	0	1	0	0	0	0	1	1	0	0	0	0	2	65	8	0	2	0	2	2	2	2	1	1	0	0	189	185	24	28	924.25	1040.15	0.0155	0.0101667	2.36094	1.74155	7	6	0	0	3	3	23	15	27	27	0	0
D369	0	0	0	0	0	0	0	0	0	0	0	0	0	2	63	9	0	2	1	2	2	2	2	1	2	1	0	151	11	10	16	994.6	959.35	0.00966667	0.00866667	0.617008	0.63048	0	0	1	0	0	2	17	13	16	16	0	0
[truncated: 1 more columns]
